# Supplementary material
Source: Springer Nature journal article supplement (https://www.springermedizin.de/resource/supplementary/12967_2006_126_MOESM3_ESM.pdf/9575758)

**Positive control**

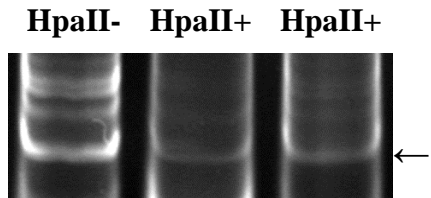

**Patient 3**

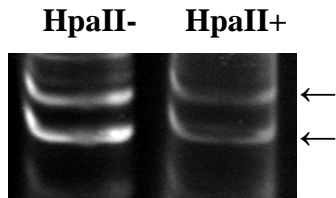

**Patient 4**

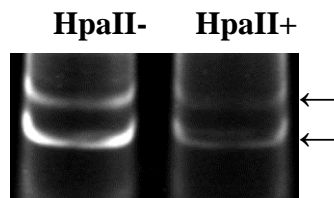

**Patient 7**

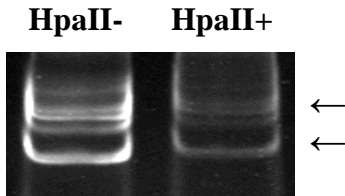

**Patient 9**

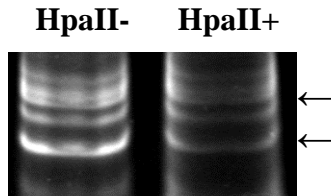

**Patient 12**

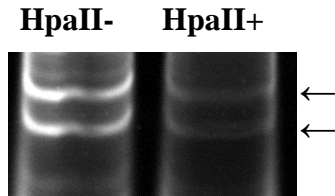

Supplement: MOESM3 [file 9575758]
